# Supplementary material
Source: Springer Nature journal article supplement (https://www.springermedizin.de/resource/supplementary/12943_2013_1250_MOESM8_ESM.pdf/9553056)
Supplement: MOESM8 [file 9553056]

## Additional file 8

### List of commercial antibodies

| Antibody | Company (catalog number) | Description  |
|----------|--------------------------|--------------|
| H3K9Ac   | Abcam (ab4441)           | ChIP         |
| H3K18Ac  | Abcam (ab1191)           | ChIP         |
| H3K27Ac  | Millipore (07-360)       | ChIP         |
| H3K4me1  | Abcam (ab8895)           | ChIP         |
| H3K4me2  | Abcam (ab7766)           | ChIP         |
| H3K4me3  | Abcam (ab8580)           | ChIP         |
| H3K36me3 | Abcam (ab9050)           | ChIP         |
| H3K79me  | Abcam (ab2886)           | ChIP         |
| H3K9me   | Abcam (ab9045)           | ChIP         |
| H3K9me2  | Millipore (07-441)       | ChIP         |
| H3K9me3  | Abcam (ab8898)           | ChIP         |
| H3K27me  | Millipore (07-448)       | ChIP         |
| H3K27me2 | Millipore (07-452)       | ChIP         |
| H3K27me3 | Millipore (07-449)       | ChIP         |
| E2F1     | Millipore (17-10061)     | ChIP, IP, WB |
| GCN5     | Santa Cruz (sc-20698)    | IP, WB       |
| PCAF     | Santa Cruz (sc-13124)    | IP, WB       |
| DNMT1    | Santa Cruz (sc-20701)    | IHC          |

**List of abbreviations used:** ChIP, Chromatin immunoprecipitation; IP, Immunoprecipitation; WB, Western blotting; IHC, Immunohistochemistry.
